# Supplementary figures and images for: Development of68Ga-labelled ultrasound microbubbles for whole-body PET imaging
Source: Royal Society of Chemistry journal article supplement (doi:10.1039/c9sc00684b), 2019-01-01

# Long acquisition study (20v, $10^8$ MB/ml)

$t=15s$

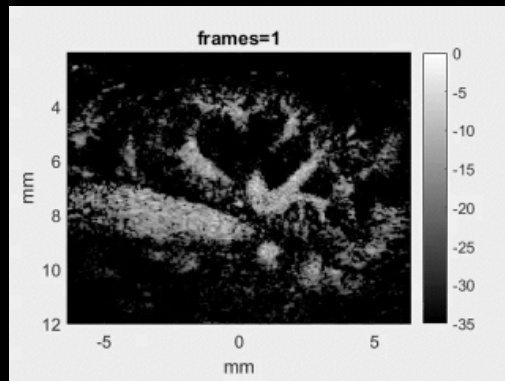

60s

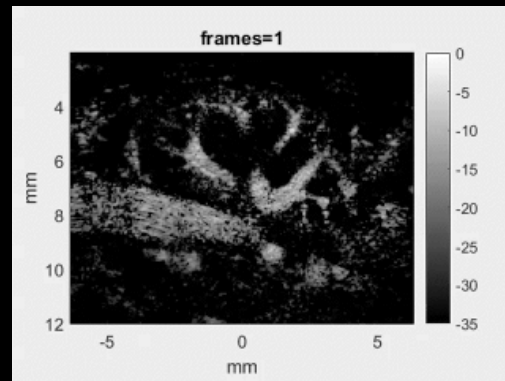

240s

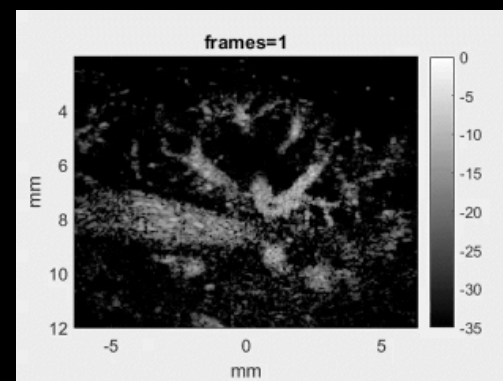

300s

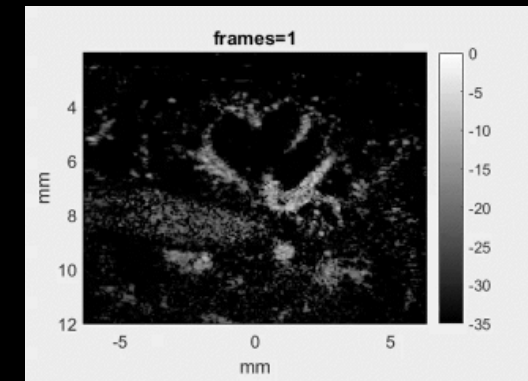

Supplement: c9sc00684b2.pdf [file c9sc00684b2.pdf]
